# Supplementary material for: The accounting of noise to solve the problem of negative populations in approximate accelerated stochastic simulations
Source: Royal Society of Chemistry journal article supplement (doi:10.1039/c4ra05865h), 2014-01-01
Supplement: c4ra05865h1.pdf [file c4ra05865h1.pdf]

## SUPPORTING INFORMATION

### **The Accounting of Noise to Solve the Problem of Negative Populations in Approximate Accelerated Stochastic Simulations**

Shantanu Kadam<sup>†</sup> and Kumar Vanka<sup>†\*</sup>

*<sup>†</sup>Physical Chemistry Division, National Chemical Laboratory, Dr. Homi Bhabha Road,*

*Pashan, Pune, Maharashtra – 411 008, India*

\*Corresponding author. E-mail: [k.vanka@ncl.res.in](mailto:k.vanka@ncl.res.in)

**(I) FIGURES:**

(S1) The comparison of trajectories for the means and CVs of the probability distributions for some key species for the case of the Carletti-Burrage Model (Equation 1) discussed in the manuscript using SSA, G-P, BD- $\tau$  of Chatterjee-Vlachos-Katsoulakis for coarse-grain factor,  $f=4$  and RRA-Noise.

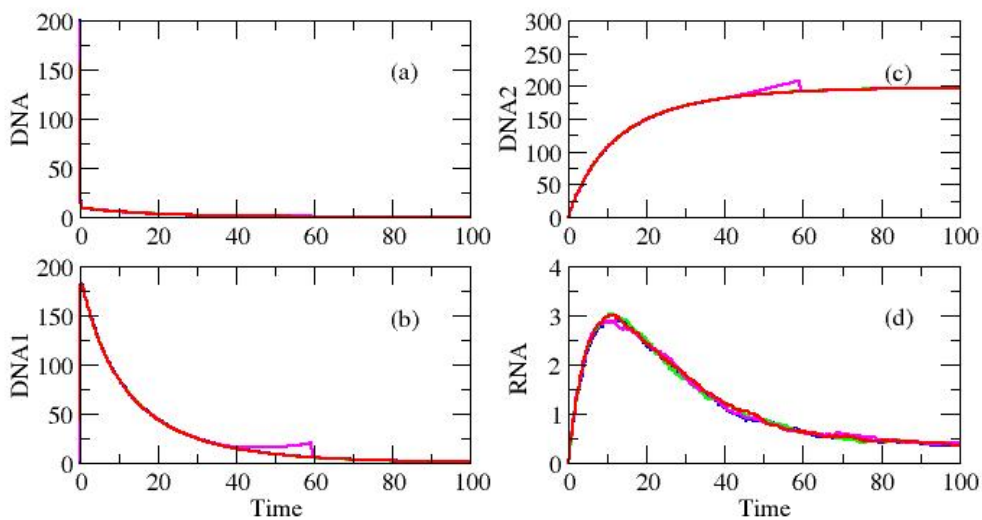

**Figure S1-(a)** The trajectories of the means [(a)-(d)] for the probability distributions of the species DNA, DNA1, DNA2 and RNA using SSA (blue curve), G-P (green curve), BD- $\tau$  of Chatterjee-Vlachos-Katsoulakis (magenta curve) and RRA-Noise (red curve).

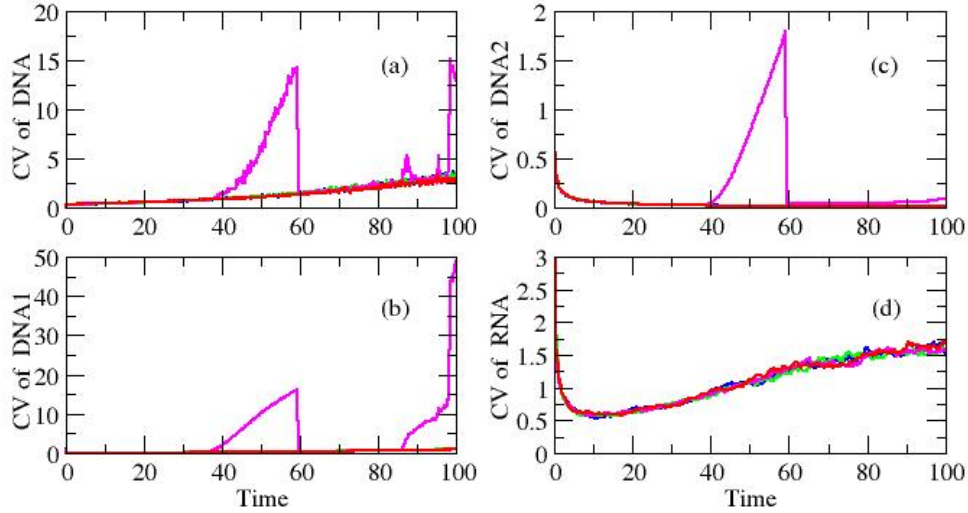

**Figure S1-(b)** The trajectories of the CVs [(a)-(d)] for the probability distributions of the species DNA, DNA1, DNA2 and RNA using SSA (blue curve), G-P (green curve), BD- $\tau$  of Chatterjee-Vlachos-Katsoulakis (magenta curve) and RRA-Noise (red curve).

**Table S1.** The average values of CPU time (in seconds) taken by different simulation methods; the coarse grain factor,  $f$ , for the BD- $\tau$  method is taken as 4.0 in the simulations.

| Simulation Methods | SSA   | G-P    | BD- $\tau$ | RRA-Noise |
|--------------------|-------|--------|------------|-----------|
| CPU time (sec)     | 5.029 | 14.970 | 32.529     | 4.234     |

(S2) The comparison of trajectories for means and CVs of the probability distributions for the species  $X_1$ ,  $X_2$ ,  $X_3$  for Simple Isomerization Reaction Model (Equation 2) discussed in the manuscript using SSA, G-P, BD- $\tau$  of Chatterjee-Vlachos-Katsoulakis for coarse-grain factor,  $f=50$ , and RRA-Noise.

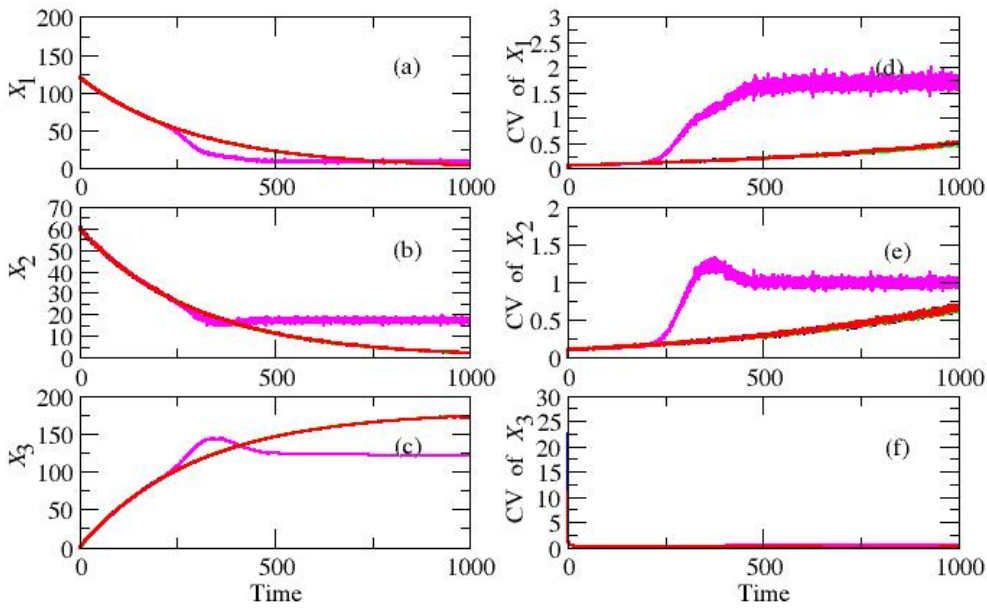

**Figure S2.** The trajectories of the means [(a)-(c)] and CVs [(d)-(f)] for the probability distributions of the species  $X_1$ ,  $X_2$ ,  $X_3$  using SSA (blue curve), G-P (green curve), BD- $\tau$  of Chatterjee-Vlachos-Katsoulakis (magenta curve) and RRA-Noise (red curve).

**Table S2.** The average values of the CPU time (in seconds) taken by the different simulation methods for the case of the Simple Isomerization Reaction Model; the coarse grain factor,  $f$ , for the BD- $\tau$  method is taken as 50.0 in the simulations.

| Simulation Methods | SSA    | G-P    | BD- $\tau$ | RRA-Noise |
|--------------------|--------|--------|------------|-----------|
| CPU time (sec)     | 83.919 | 33.131 | 25.186     | 36.354    |

(S3) The comparison of trajectories for means and CVs of the probability distributions for the species  $X_1$ ,  $X_2$ ,  $X_3$  for Simple Isomerization Reaction Model (Equation 2) discussed in the manuscript using SSA, G-P, BD- $\tau$  of Chatterjee-Vlachos-Katsoulakis for coarse-grain factor,  $f=100$ , and RRA-Noise.

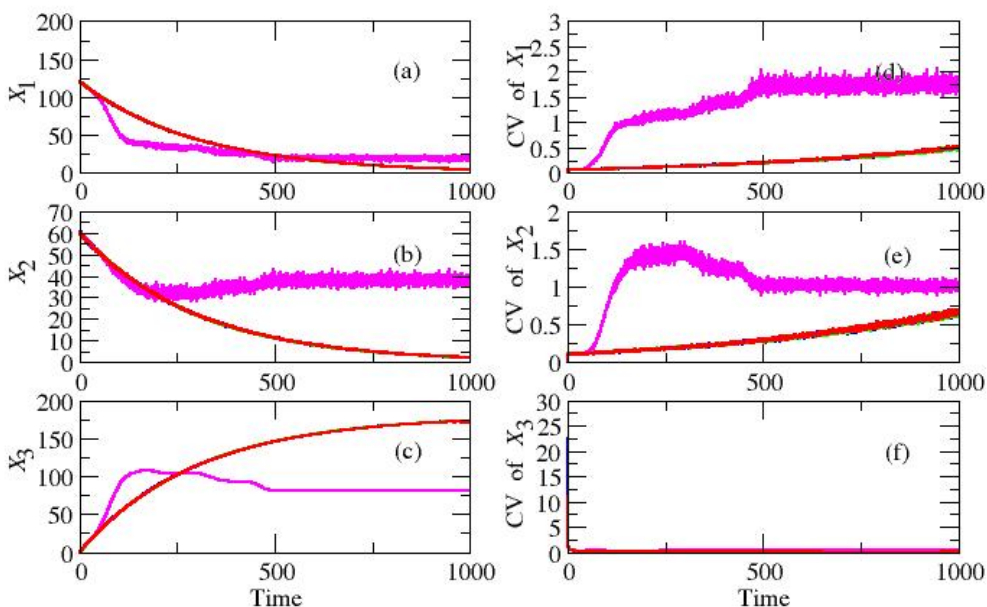

**Figure S3.** The trajectories of the means [(a)-(c)] and CVs [(d)-(f)] for the probability distributions of the species  $X_1$ ,  $X_2$ ,  $X_3$  using SSA (blue curve), G-P (green curve), BD- $\tau$  of Chatterjee-Vlachos-Katsoulakis (magenta curve) and RRA-Noise (red curve).

**Table S3.** The average values of the CPU time (in seconds) taken by the different simulation methods for the case of the Simple Isomerization Reaction Model; the coarse grain factor,  $f$ , for the BD- $\tau$  method is taken as 100.0 in the simulations.

| Simulation Methods | SSA    | G-P    | BD- $\tau$ | RRA-Noise |
|--------------------|--------|--------|------------|-----------|
| CPU time (sec)     | 83.919 | 33.131 | 22.994     | 36.354    |

(S4) The comparison of trajectories for means and CVs of the probability distributions for the species  $X_1$ ,  $X_2$ ,  $X_3$  for the Model of First Order Reactions (Equation 3) discussed in the manuscript using SSA, BD- $\tau$  of Chatterjee-Vlachos-Katsoulakis for coarse-grain factor,  $f=5000$ , and RRA-Noise.

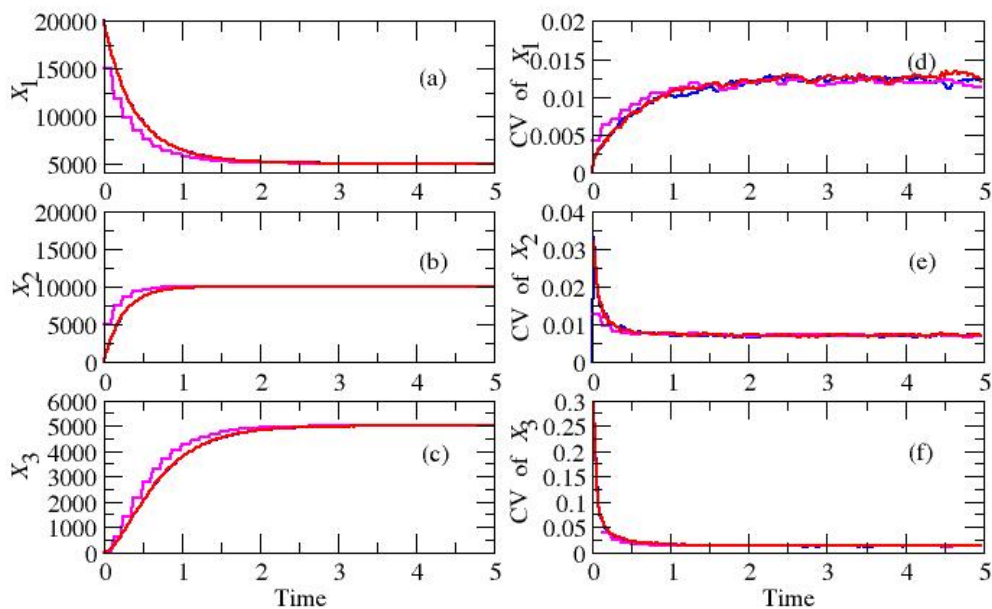

**Figure S4.** The trajectories of the means [(a)-(c)] and CVs [(d)-(f)] for the probability distributions of the species  $X_1$ ,  $X_2$ ,  $X_3$  using SSA (blue curve), BD- $\tau$  of Chatterjee-Vlachos-Katsoulakis (magenta curve) and RRA-Noise (red curve).

**Table S4.** The average values of the CPU time (in seconds) taken by the different simulation methods for the case of the Model of First Order Reactions; the coarse grain factor,  $f$ , for the BD- $\tau$  method is taken as 5000.0 in the simulations.

| Simulation Methods | SSA    | BD- $\tau$ | RRA-Noise |
|--------------------|--------|------------|-----------|
| CPU time (sec)     | 18.141 | 1.093      | 9.557     |

(S5) The comparison of trajectories for means and CVs of the probability distributions for the species  $X_1$ ,  $X_2$ ,  $X_3$  for the Model of First Order Reactions (Equation 3) discussed in the manuscript using SSA, BD- $\tau$  of Chatterjee-Vlachos-Katsoulakis for coarse-grain factor,  $f=10000$ , and RRA-Noise.

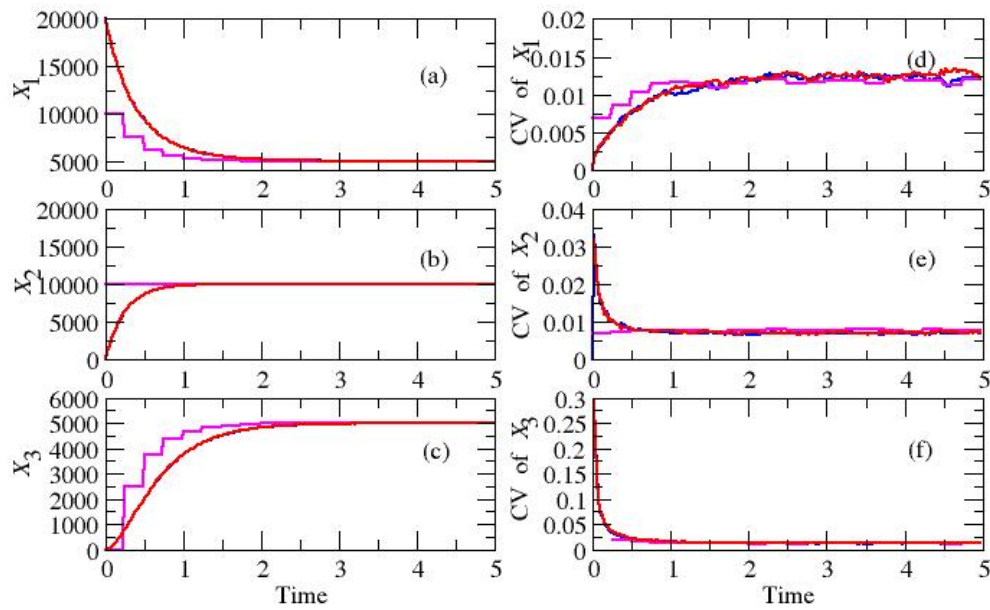

**Figure S5.** The trajectories of the means [(a)-(c)] and CVs [(d)-(f)] for the probability distributions of the species  $X_1$ ,  $X_2$ ,  $X_3$  using SSA (blue curve), BD- $\tau$  of Chatterjee-Vlachos-Katsoulakis (magenta curve) and RRA-Noise (red curve).

**Table S5.** The average values of the CPU time (in seconds) taken by the different simulation methods for the case of the Model of First Order Reactions; the coarse grain factor,  $f$ , for the BD- $\tau$  method is taken as 10000.0 in the simulations.

| Simulation Methods | SSA    | BD- $\tau$ | RRA-Noise |
|--------------------|--------|------------|-----------|
| CPU time (sec)     | 18.141 | 0.974      | 9.557     |



(S6) The comparison of trajectories for means and CVs of the probability distributions for the species  $X_1, X_2, X_3$  for the Simple Model System (Equation 4) discussed in the manuscript using SSA, BD- $\tau$  of Chatterjee-Vlachos-Katsoulakis for coarse-grain factor,  $f=500$ , and RRA-Noise.

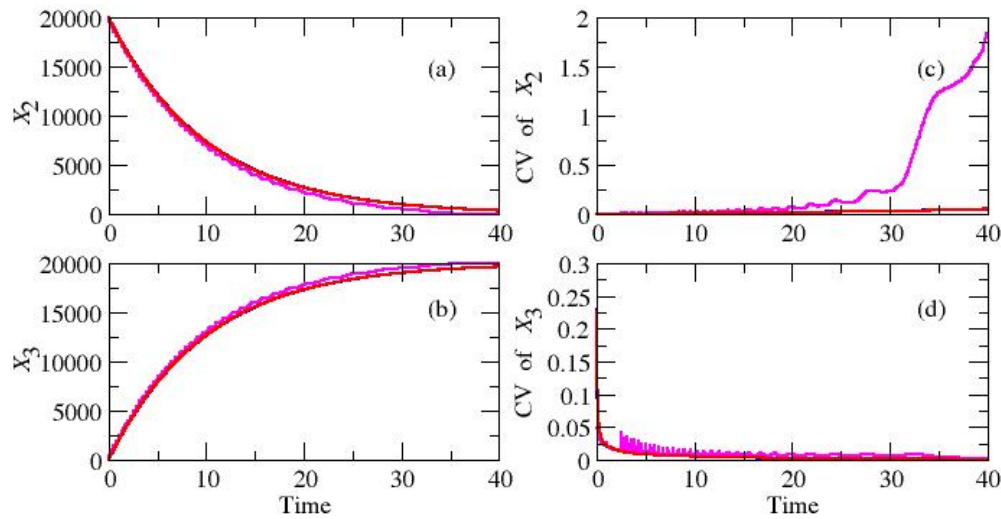

**Figure S6.** The trajectories of the means [(a) and (b)] and CVs [(c) and (d)] for the probability distributions of the species  $X_2, X_3$  using SSA (blue curve), BD- $\tau$  of Chatterjee-Vlachos-Katsoulakis (magenta curve) and RRA-Noise (red curve).

**Table S6.** The average values of the CPU time (in seconds) taken by the different simulation methods for the case of the Simple Model System; the coarse grain factor,  $f$ , for the BD- $\tau$  method is taken as 500.0 in the simulations.

| Simulation Methods | SSA   | BD- $\tau$ | RRA-Noise |
|--------------------|-------|------------|-----------|
| CPU time (sec)     | 8.298 | 6.160      | 7.257     |

|  |  |  |  |
|--|--|--|--|
|  |  |  |  |
|--|--|--|--|

(S7) The comparison of trajectories for means and CVs of the probability distributions for the species  $X_1, X_2, X_3$  for the Simple Model System (Equation 4) discussed in the manuscript using SSA, BD- $\tau$  of Chatterjee-Vlachos-Katsoulakis for coarse-grain factor,  $f=1000$ , and RRA-Noise.

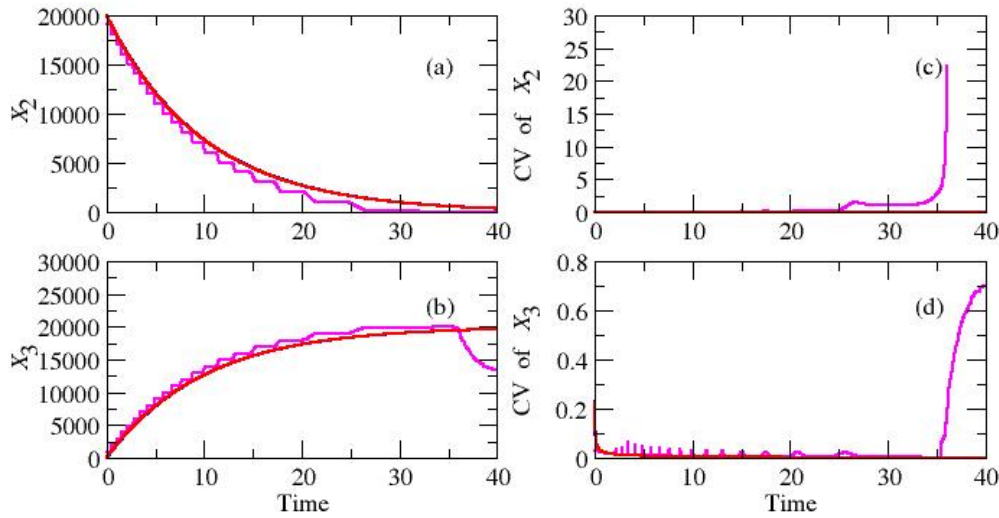

**Figure S7.** The trajectories of the means [(a) and (b)] and CVs [(c) and (d)] for the probability distributions of the species  $X_2, X_3$  using SSA (blue curve), BD- $\tau$  of Chatterjee-Vlachos-Katsoulakis (magenta curve) and RRA-Noise (red curve).

**Table S7.** The average values of the CPU time (in seconds) taken by the different simulation methods for the case of the Simple Model System; the coarse grain factor,  $f$ , for the BD- $\tau$  method is taken as 1000.0 in the simulations.

| Simulation Methods | SSA   | BD- $\tau$ | RRA-Noise |
|--------------------|-------|------------|-----------|
| CPU time (sec)     | 8.298 | 6.256      | 7.257     |

**(II) TABLES:**

**Table S8.** The rate constants for the different reactions in the Carletti-Burrage Model discussed in the manuscript.

| Rate Constants used in the simulation  | Numerical values of the Rate Constants |
|----------------------------------------|----------------------------------------|
| Rate constant of $R_1$ ( $c_1$ )       | 0.078                                  |
| Rate constant of $R_2$ ( $c_2$ )       | 3.9E-3                                 |
| Rate constant of $R_3$ ( $c_3$ )       | 7.0E-4                                 |
| Rate constant of $R_4$ ( $c_4$ )       | 0.043                                  |
| Rate constant of $R_5$ ( $c_5$ )       | 0.083                                  |
| Rate constant of $R_6$ ( $c_6$ )       | 0.5                                    |
| Rate constant of $R_7$ ( $c_7$ )       | 0.020                                  |
| Rate constant of $R_8$ ( $c_8$ )       | 0.479                                  |
| Rate constant of $R_9$ ( $c_9$ )       | 2.0E-4                                 |
| Rate constant of $R_{10}$ ( $c_{10}$ ) | 8.765E-12                              |

**Table S9.** The initial values of the different species in the Carletti-Burrage Model discussed in the manuscript.

| Species used in the simulation | Numerical values of the Species |
|--------------------------------|---------------------------------|
| DNA                            | 200                             |
| DNA1                           | 000                             |
| DNA2                           | 000                             |
| D                              | 600                             |
| m                              | 200                             |
| RNA                            | 000                             |

**Table S10.** The rate constants for the different reactions in the Simple Isomerization Reaction Model as wells as the initial values of different species.

| Rate Constants used in the | Numerical values of the |
|----------------------------|-------------------------|
|                            |                         |

| simulation                       | Rate Constants |
|----------------------------------|----------------|
| Rate constant of $R_1$ ( $c_1$ ) | 1.0            |
| Rate constant of $R_2$ ( $c_2$ ) | 2.0            |
| Rate constant of $R_3$ ( $c_3$ ) | 0.01           |
| Initial number of $X_1$ species  | 120            |
| Initial number of $X_2$ species  | 60             |
| Initial number of $X_3$ species  | 0              |

**Table S11.** The rate constants for the different reactions in the Simple Reaction Model as well as the initial values of different species.

| Rate Constants used in the simulation | Numerical values of the Rate Constants |
|---------------------------------------|----------------------------------------|
| Rate constant of $R_1$ ( $c_1$ )      | 10.0                                   |
| Rate constant of $R_2$ ( $c_2$ )      | 0.1                                    |

|                                 |       |
|---------------------------------|-------|
| Initial number of $X_1$ species | 9     |
| Initial number of $X_2$ species | 20000 |
| Initial number of $X_3$ species | 0     |

**Table S12.** The rate constants for the different reactions in the First Order Reaction Model as well as the initial values of different species.

| Rate Constants used in the simulation | Numerical values of the Rate Constants |
|---------------------------------------|----------------------------------------|
| Rate constant of $R_1$ ( $c_1$ )      | 2.0                                    |
| Rate constant of $R_2$ ( $c_2$ )      | 1.0                                    |
| Rate constant of $R_3$ ( $c_3$ )      | 2.0                                    |
| Rate constant of $R_4$ ( $c_4$ )      | 1.0                                    |
| Initial number of $X_1$ species       | 20000                                  |
| Initial number of $X_2$ species       | 0                                      |
| Initial number of $X_3$ species       | 0                                      |

|  |  |
|--|--|
|  |  |
|--|--|

**Table S13.** The rate constants for the different reactions in the Oregonator Reaction Model as well as the initial values of different species.

| Rate Constants used in the simulation | Numerical values of the Rate Constants |
|---------------------------------------|----------------------------------------|
| Rate constant of $R_1$ ( $c_1$ )      | 2.0                                    |
| Rate constant of $R_2$ ( $c_2$ )      | 0.1                                    |
| Rate constant of $R_3$ ( $c_3$ )      | 104.0                                  |
| Rate constant of $R_4$ ( $c_4$ )      | 0.016                                  |
| Rate constant of $R_5$ ( $c_5$ )      | 26.0                                   |
| Initial number of $Y_1$ species       | 500                                    |
| Initial number of $Y_2$ species       | 1000                                   |
| Initial number of $Y_3$ species       | 2000                                   |



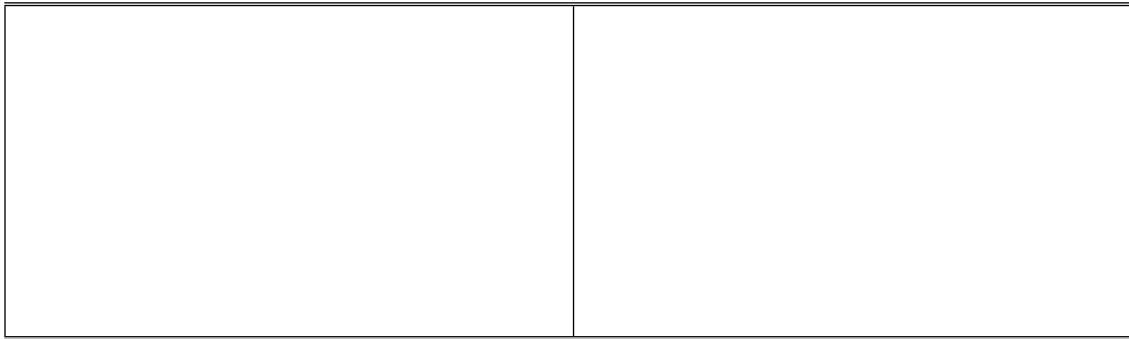

### (III) CODES:

#### (I) SSA

```
! PROGRAM FOR CARLETTI-BURRAGE MODEL
! USING STOCHASTIC SIMULATION ALGORITHM (SSA)
! FORTRAN 95 COMPILER HAVE BEEN USED FOR COMPILATION
! AUTHORS: SHANTANU KADAM AND KUMAR VANKA
! PHYSICAL CHEMISTRY DIVISION, NATIONAL CHEMICAL LABORATORY
! PUNE,MAHARASHTRA-411008, INDIA
```

```
implicit none
```

```
integer *4 i,steps,j,mu,k,tinc,cont,itr,nrun,run
```

```
CHARACTER*30 crun
```

```
CHARACTER*50 datfilename
```

```
INTEGER fileunit,n_steps
```

```
integer *4 k1,k2,k3,k4,N,exact,accel,toz
```

```
integer *4 mspec,DNA,Dspec,RNA,DNA1,DNA2
```

```
real *8 min,tau(10),treal,tmed,tmedp,tstep
```

```
integer *4 x1,x2,x3,t,it,tmpo
```

```
real *8 sr1,sr2,sr3,tp,r56,avg,tprint
```

```
real *8 eps,z1,z2,ap,r1,r2,r3,ran3
```

```
real *8 de1,de2,de3,de4,numer,ran
```

```
real *8 d1,d2,d3,d4,a0,poidev,one,two,four
```

```
real *8 c1,c2,c3,c4,tau1,tau2,tau3,tau4
```

```
real *8 c5,c6,c7,c8,c9,c10,a5,a6,a7,a8,a9,a10
```

```
real *8 three,r,s,a1,a2,a3,a4,taue,asum5
```

```
integer *4 cou1,cou2,cou3,cou4,idum,ctop
```

```
integer *4 cou5,cou6,cou7,cou8,cou9,cou10
```

```
real *8 tin,tff
```

```
CHARACTER(LEN=20):: fl02, num
```

```
!
```

```
nrun = 500
```

```
!
```

```
!*****INPUT/OUTPUT FILES*****
```

```
!
```

```
open(897,file='cputime',form='formatted',access='sequential',status='unknown')
```

```
open(98,file='counter',form='formatted',access='sequential',status='unknown')
```

```
!
```

```
write(num,*) 3 !N_component
```

```

write(f102,*) '(e16.9,',trim(adjustl(num)),',I20)'
!
      call cpu_time(tin)
do run=1,nrun
  n_steps = 0
  write(crun,*) run
  datfilename='./data/x1out. '//trim(adjustl(crun))
  fileunit = 1000 + run
  write(*,*) run,'fileunit=',fileunit

  open(unit=fileunit, file= trim(adjustl(datfilename)),status='replace')
!

      rewind 98
      rewind 897
!
!*****MAIN PROGRAM*****
!
      t = 0
      tstep = 0.25
      tp = 0.0
!
      ctop = 0
      idum = 864321+run
!
      steps = 0
      exact = 0
      treal = 0.0
      tprint = 0.0
!
      mspec = 200
      DNA = 200
      Dspec = 600
      RNA = 00
      DNA1 = 00
      DNA2 = 00
!
      c1 = 0.078
      c2 = 3.9E-3
      c3 = 7.0E-4
      c4 = 0.043
      c5 = 0.083
      c6 = 0.5
      c7 = 0.020
      c8 = 0.479
      c9 = 2.0E-4
      c10 = 8.765E-12
!
      do 33 i = 1, 2000000
!

```

```

a1 = c1*RNA
a2 = c2*DNA1
a3 = c3*mspec
a4 = c4*RNA
a5 = c5*(mspec*(mspec-1))/2
a6 = c6*Dspec
a7 = c7*DNA*Dspec
a8 = c8*DNA1
a9 = c9*DNA1*Dspec
a10 = c10*DNA2
!
a0 = a1+a2+a3+a4+a5+a6+a7+a8+a9+a10
!
! write(99,*)a1,a2,a3,a4,a5,a6,a7,a8,a9,a10
! write(66,*) a0
exact = exact + 1
!
!*****GENERATION OF THE RANDOM NUMBERS*****
r1 = ran3(idum)
taue = (1/a0)*log(1/r1)
! write(20,*) taue
r2 = ran3(idum)
r3 = r2*a0
! write(31,*) r1,r2
!
!*****SELECTION OF A REACTION*****
!
! asum5 = a1+a2+a3+a4+a5
!
! if(a1.gt.r3)then
mu = 1
! elseif(a1+a2.gt.r3)then
mu = 2
! elseif(a1+a2+a3.gt.r3)then
mu = 3
! elseif(a1+a2+a3+a4.gt.r3)then
mu = 4
! elseif(a1+a2+a3+a4+a5.gt.r3)then
mu = 5
! elseif(a1+a2+a3+a4+a5+a6.gt.r3)then
mu = 6
! elseif(a1+a2+a3+a4+a5+a6+a7.gt.r3)then
mu = 7
! elseif(a1+a2+a3+a4+a5+a6+a7+a8.gt.r3)then
mu = 8
! elseif(a1+a2+a3+a4+a5+a6+a7+a8+a9.gt.r3)then
mu = 9
! elseif(a0.gt.r3)then
mu = 10

```

```

endif
!
treal = treal + taue
!
if(mu.eq.1)then
RNA = RNA - 1
DNA1 = DNA1 + 1
elseif(mu.eq.2)then
RNA = RNA + 1
DNA1 = DNA1 - 1
elseif(mu.eq.3)then
mspec = mspec - 1
RNA = RNA + 1
else if(mu.eq.4)then
mspec = mspec + 1
RNA = RNA - 1
elseif(mu.eq.5)then
mspec = mspec - 2
Dspec = Dspec + 1
elseif(mu.eq.6)then
mspec = mspec + 2
Dspec = Dspec - 1
elseif(mu.eq.7)then
DNA = DNA - 1
Dspec = Dspec - 1
DNA1 = DNA1 + 1
elseif(mu.eq.8)then
DNA = DNA + 1
Dspec = Dspec + 1
DNA1 = DNA1 - 1
elseif(mu.eq.9)then
Dspec = Dspec - 1
DNA1 = DNA1 - 1
DNA2 = DNA2 + 1
elseif(mu.eq.10)then
Dspec = Dspec + 1
DNA1 = DNA1 + 1
DNA2 = DNA2 - 1
endif
!
!*****CHECK TO PRINT tprint*****
!
if(treal.gt.tprint)then
tmed = treal-tprint
tmedp = tmed/tstep
itr = int(tmedp)
!
do 159 j = 0, itr
!

```

```

        if(tprint.le.100)then
        write(fileunit,trim(adjustl(f102)))tprint,DNA,DNA1,DNA2
        tprint = tprint + tstep
        n_steps = n_steps + 1
        else
        go to 303
        endif
    !
    !   159   continue
    !
    !   else
    !
    !   go to 324
    !   endif
324    !       steps = steps + 1
    !
    !       33   continue
    303    write(88,*)'number of steps = ', steps
        write(98,*) exact, n_steps
    !
        close(fileunit)
    end do
!
CALL compileStats(3,nrun,n_steps)
        call cpu_time(tfi)
        write(897,*) 'cputime',tfi-tin !CPU TIME
!
close(98)
close(897)
!
stop
end
!*****MAIN PROGRAM ENDS*****

!
!*****STATISTICS*****
!
SUBROUTINE compileStats(N_comp, N_run, n_steps)
!
IMPLICIT NONE
INTEGER N_run, n_steps, N_comp
INTEGER run, d, j, fileunit, k102, jjj, kk, jj
REAL, DIMENSION(n_steps):: tempt
DOUBLE PRECISION, DIMENSION(1:n_steps, N_comp) :: rtempc,concsun,concsunsq
REAL, DIMENSION(1:n_steps, N_comp)::stdconc, meanconc, variance
REAL, DIMENSION(1:n_steps, N_comp)::cvconc
INTEGER, DIMENSION(1:n_steps, N_comp) ::tempc
REAL tttt

```

```

!
CHARACTER(LEN=20):: f102, f151, f202, num
CHARACTER*25 momfilename, datfilename, crun
!
concsun(1:n_steps,1:N_comp) =0;
concsunsq(1:n_steps,1:N_comp) =0;
!
write(num,*) N_comp*3
write(f102,*) '(e16.9',trim(adjustl(num)), 'I20)'
!
do d=1,N_run !***** run loop starts *****!
!
!   read data
!       write(crun,*) d
!
!       datfilename = './data/x1out. '//trim(adjustl(crun))
!       fileunit=1000+2*d
!
!       write(*,*) 'datfilename in getstats is ',datfilename
!       open(fileunit, file=trim(adjustl(datfilename)))
!       tempt(1:n_steps) =0.0d0
!       tempc(1:n_steps,1:N_comp) =0
!
!       write(*,*) 'tempc is'
!
!       write(*,*) 'nsteps N_comp',n_steps,N_comp
!       do j=1,n_steps
!
!           read(fileunit,trim(adjustl(f102)),end=10) tempt(j),(tempc(j,k102),k102=1,N_comp)
!           !write(*,*)tempt(j),(tempc(j,k102),k102=1,N_comp)
!           rtempc(j,1:N_comp)=tempc(j,1:N_comp) ! converting integer conc to real to store large values
!
! for initial condition
!       concsun(j,1:N_comp) = rtempc(j,1:N_comp) + concsun(j,1:N_comp)
!
!       concsunsq(j, 1:N_comp)= ((rtempc(j,1:N_comp))**2) +&
&       concsunsq(j, 1:N_comp)
!
!       end do !j
10   continue
!       close(fileunit)
!
!       end do
!
!
!       meanconc(1:n_steps,1:N_comp) =0
!       stdconc(1:n_steps,1:N_comp) =0
!       cvconc(1:n_steps,1:N_comp) =0
!
!

```

```

print *, 'n_runs', N_run
meanconc(1:n_steps, 1:N_comp) = DBLE(concsum)/DBLE(N_run)
!

do jjj=1, n_steps
  do kk = 1, N_comp
!
!
    stdconc(jjj, kk) = SQRT((DBLE(concsumsq(jjj, kk)) * DBLE(N_run)   &
&      - DBLE(concsum(jjj, kk)**2) / DBLE(N_run *(N_run-1)))
!
!
    cvconc(jjj, kk) = stdconc(jjj, kk)/meanconc(jjj, kk)
  end do      !kk
end do      !jjj
!

do jjj=1, n_steps
  do kk = 1, N_comp
    variance(jjj, kk) = ((DBLE(concsumsq(jjj, kk)) * DBLE(N_run)   &
&      - DBLE(concsum(jjj, kk)**2) / DBLE(N_run *(N_run-1)))
  end do
end do
!

jj=0
!

open(unit=71, file='finalstats', status='replace')
!

write(71, *) ' STEP    TIME    MEAN (all components)    STDEV    VAR CV'
!

write(num, *) N_comp*5
write(num, *) N_comp*4
write(f202, *) '(I10, e16.9, trim(adjustl(num)), e30.9)'
!

!202 format(I10, e16.9, 30e30.9)
do jj=1, n_steps
  tttt=(jj-1)*tempt(2)
  write(71, trim(adjustl(f202))) jj, tttt, meanconc(jj, :), stdconc(jj, :), variance(jj, :), cvconc(jj, :)
end do
!

close(71)
!

stop
write(*, *) 'all stats are in the file finalstats'
!

return
END SUBROUTINE compilestats

```

## (II) GP

```
! PROGRAM FOR CARLETTI-BURRAGE MODEL
```

```

! USING GILLESPIE-PETZOLD ALGORITHM (GP)
! FORTRAN 95 COMPILER HAVE BEEN USED FOR COMPILATION
! AUTHORS: SHANTANU KADAM AND KUMAR VANKA
! PHYSICAL CHEMISTRY DIVISION, NATIONAL CHEMICAL LABORATORY
! PUNE,MAHARASHTRA-411008, INDIA

```

```

implicit none
integer *4 i,steps,j,mu,k,tinc,cont,itr,nrun,run
CHARACTER*30 crun
CHARACTER*50 datfilename
INTEGER fileunit,n_steps
integer *4 k1,k2,k3,k4,N,exact,accel,toz
real *8 tau(10),treal,tmed,tmedp,tstep
integer *4 x1,x2,x3,t,it,tmpo
real *8 sr1,sr2,sr3,tp,r56,avg,tprint
real *8 least,mu91,mu92,sgma9sq2,sgma9sq1
real *8 exp1,exp2,exp3,exp4,exp5,exp6,exp7
real *8 exp8,exp9,exp10,sgma9sq3
integer *4 mspec,DNA,Dspec,RNA,DNA1,DNA2
real *8 a1,a2,a3,a4,a5,a6,a7,a8,a9,a10,asum5,asum10
real *8 a11,a12,a13,a14,a15,a16,a17,a18,a0,a01,a02
real *8 mu1,mu2,mu3,mu4,mu5,mu6,mu7,mu8,mu9,mu10
real *8 sgma1sq,sgma2sq,sgma3sq,sgma4sq,sgma5sq,sgma6sq
real *8 sgma7sq,sgma8sq,sgma9sq,sgma10sq
real *8 arg1,arg2,arg3,arg4,arg5,arg6,arg7,arg8,arg9,arg10,arg11
real *8 arf1,arf2,arf3,arf4,arf5,arf6,arf7,arf8,arf9,arf10,arf11
real *8 c1,c2,c3,c4,c5,c6,c7,c8,c9,c10
integer *4 n1,n2,n3,n4,n5,n6,n7,n8,n9,n10
real *8 eps,z1,z2,ap,r1,r2,r3,sr4,sr5,sr6
real *8 de1,de2,de3,de4,numer,ran3
real *8 d1,d2,d3,d4,poidev,one,two,four
real *8 tau1,tau2,tau3,tau4
real *8 three,r,s,taue
integer *4 idum,ctop
integer *4 kit,kat,xf,NHP,irec,kit1,kat1
real *8 tin,tfi,xx1(1000),xx2(1000),xx3(1000)
CHARACTER(LEN=20):: f102, num

```

```

!
! nrun = 500
!
!*****INPUT/OUTPUT FILES*****
!
open(897,file='cputime',form='formatted',access='sequential',status='unknown')
open(13,file='extra',form='formatted',access='sequential',status='unknown')
open(98,file='counter',form='formatted',access='sequential',status='unknown')
!
write(num,*) 3 !N_component
write(f102,*) '(e16.9',trim(adjustl(num)),',I20)'
!
!
! call cpu_time(tin)

```



```

do run=1,nrun
  n_steps = 0
  write(crun,*) run
  datfilename='./data/x1out.//trim(adjustl(crun))
  fileunit = 1000 + run
  write(*,*) run,'fileunit=',fileunit
!
!
  open(unit=fileunit, file= trim(adjustl(datfilename)),status='replace')

  rewind 13
  rewind 98
  rewind 897
!
!*****MAIN PROGRAM*****
!
  t = 0
  tstep = 0.25
  tp = 0.0
!
  ctop = 0
  idum = 84321+run
!
  steps = 0
  exact = 0
  accel = 0
  treal = 0.0
  tprint = 0.0
!
  mspec = 200
  DNA = 200
  Dspec = 600
  RNA = 0
  DNA1 = 0
  DNA2 = 0
!
  c1 = 0.078
  c2 = 3.9E-3
  c3 = 7.0E-4
  c4 = 0.043
  c5 = 0.083
  c6 = 0.5
  c7 = 0.020
  c8 = 0.479
  c9 = 2.0E-4
  c10 = 8.765E-12
!
  do 33 i = 1,50000
!
    a1 = c1*RNA

```

```

a2 = c2*DNA1
a3 = c3*mspec
a4 = c4*RNA
a5 = c5*(mspec*(mspec-1))/2
a6 = c6*Dspec
a7 = c7*DNA*Dspec
a8 = c8*DNA1
a9 = c9*DNA1*Dspec
a10 = c10*DNA2

```

!

```
a0 = a1 + a2 + a3 + a4 + a5 + a6 + a7 + a8 + a9 + a10
```

!

```

mu1 = c1*(-a1 + a2 + a3 - a4)
mu2 = c2*(a1 - a2 + a7 - a8 - a9 + a10)
mu3 = c3*(-a3 + a4 - 2*a5 + 2*a6)
mu4 = c4*(-a1 + a2 + a3 - a4)
mu5 = (a4 - a3)*(c5*((2*mspec-1))/2) + (a6 - a5)*(c5*(2*mspec-1))
mu6 = c6*(a5 - a6 - a7 + a8 - a9 + a10)
mu7 = c7*DNA*(a5 - a6 - a7 + a8 - a9 + a10) + c7*Dspec*(-a7 + a8)
mu8 = c8*(a1 - a2 + a7 - a8 - a9 + a10)
mu91 = (c9*Dspec)*(a1 - a2) + (c9*DNA1)*(a5 - a6) + (c9*Dspec - c9*DNA1)*a7 +

```

```

(c9*DNA1 - c9*Dspec)*a8

```

```

mu92 = (-c9*DNA1 - c9*Dspec)*a9 + (c9*DNA1 +

```

```

c9*Dspec)*a10

```

```

mu9 = mu91 + mu92
mu10 = c10*(a9 - a10)

```

!

```
eps = 0.03 ! ERROR CONTROL PARAMETER EPSILON
```

!

```

sgma1sq = (c1*c1)*(a1 + a2 + a3 + a4)
sgma2sq = (c2*c2)*(a1 + a2 + a7 + a8 + a9 + a10)
sgma3sq = (c3*c3)*(a3 + a4 + 4*a5 + 4*a6)
sgma4sq = (c4*c4)*(a1 + a2 + a3 + a4)
sgma5sq = (a3 + a4)*(((c5*(2*mspec-1))/2)**2) + (a5 + a6)*(((c5*(2*mspec-1)))**2)
sgma6sq = (a5 + a6 + a7 + a8 + a9 + a10)*((c6)**2)
sgma7sq = (a5 + a6 + a9 + a10)*((c7*DNA)**2) + (a7 + a8)*(((c7*DNA)**2) +
((c7*Dspec)**2) + (2*Dspec*DNA*c7*c7))
sgma8sq = (a1 + a2 + a7 + a8 + a9 + a10)*((c8)**2)
sgma9sq1 = ((c9*Dspec)**2)*(a1 + a2) + ((c9*DNA1)**2)*(a5 + a6)
sgma9sq2 = (((c9*DNA1)**2) + ((c9*Dspec)**2) - (2*Dspec*DNA1*c9*c9))*(a7+a8)
sgma9sq3 = (((c9*DNA1)**2) + ((c9*Dspec)**2) + (2*Dspec*DNA1*c9*c9))*(a9+a10)
sgma9sq = sgma9sq1 + sgma9sq2 + sgma9sq3
sgma10sq = (a9 + a10)*(c10*c10)

```

!

```

arg1 = (eps*a0)/abs(mu1)
arg2 = (eps*a0)/abs(mu2)
arg3 = (eps*a0)/abs(mu3)
arg4 = (eps*a0)/abs(mu4)
arg5 = (eps*a0)/abs(mu5)
arg6 = (eps*a0)/abs(mu6)

```

```

arg7 = (eps*a0)/abs(mu7)
arg8 = (eps*a0)/abs(mu8)
arg9 = (eps*a0)/abs(mu9)
arg10 = (eps*a0)/abs(mu10)
!
numer = (eps**2.0)*(a0**2.0)
!
arf1 = numer/sgma1sq
arf2 = numer/sgma2sq
arf3 = numer/sgma3sq
arf4 = numer/sgma4sq
arf5 = numer/sgma5sq
arf6 = numer/sgma6sq
arf7 = numer/sgma7sq
arf8 = numer/sgma8sq
arf9 = numer/sgma9sq
arf10 = numer/sgma10sq
!
tau(1) = min(arg1,arf1)
tau(2) = min(arg2,arf2)
tau(3) = min(arg3,arf3)
tau(4) = min(arg4,arf4)
tau(5) = min(arg5,arf5)
tau(6) = min(arg6,arf6)
tau(7) = min(arg7,arf7)
tau(8) = min(arg8,arf8)
tau(9) = min(arg9,arf9)
tau(10) = min(arg10,arf10)
!
least = tau(1)
do 30 j = 2,10
if(tau(j).lt.least)then
least = tau(j)
end if
30 continue
!
ap = 2/a0
!
if(least.lt.ap)then
exact = exact + 1
!
! write(56,*) 'USE SSA'
!*****GENERATION OF THE RANDOM NUMBERS*****
r1 = ran3(idum)
taue = (1/a0)*log(1/r1)
! write(93,*) taue
r2 = ran3(idum)
r3 = r2*a0
!

```

```

!*****SELECTION OF A REACTION*****
!
  asum5 = a1+a2+a3+a4+a5
  asum10 = a6+a7+a8+a9+a10
!
  if(a1.gt.r3)then
    mu = 1
  elseif(a1+a2.gt.r3)then
    mu = 2
  elseif(a1+a2+a3.gt.r3)then
    mu = 3
  elseif(a1+a2+a3+a4.gt.r3)then
    mu = 4
  elseif(asum5.gt.r3)then
    mu = 5
  elseif(asum5+a6.gt.r3)then
    mu = 6
  elseif(asum5+a6+a7.gt.r3)then
    mu = 7
  elseif(asum5+a6+a7+a8.gt.r3)then
    mu = 8
  elseif(asum5+a6+a7+a8+a9.gt.r3)then
    mu = 9
  elseif(asum5+asum10.gt.r3)then
    mu = 10
  endif
!
  treal = treal + taue
!
  if(mu.eq.1)then
    RNA = RNA - 1
    DNA1 = DNA1 + 1
  elseif(mu.eq.2)then
    RNA = RNA + 1
    DNA1 = DNA1 - 1
  elseif(mu.eq.3)then
    mspec = mspec - 1
    RNA = RNA + 1
  elseif(mu.eq.4)then
    mspec = mspec + 1
    RNA = RNA - 1
  elseif(mu.eq.5)then
    mspec = mspec - 2
    Dspec = Dspec + 1
  elseif(mu.eq.6)then
    mspec = mspec + 2
    Dspec = Dspec - 1
  elseif(mu.eq.7)then
    DNA = DNA - 1

```

```

    Dspec = Dspec - 1
    DNA1 = DNA1 + 1
    elseif(mu.eq.8)then
    DNA = DNA + 1
    Dspec = Dspec + 1
    DNA1 = DNA1 - 1
    elseif(mu.eq.9)then
    Dspec = Dspec - 1
    DNA1 = DNA1 - 1
    DNA2 = DNA2 + 1
    elseif(mu.eq.10)then
    Dspec = Dspec + 1
    DNA1 = DNA1 + 1
    endif
!
!*****CHECK TO PRINT tprint*****
!
    if(treal.gt.tprint)then
    tmed = treal-tprint
    tmedp = tmed/tstep
    itr = int(tmedp)
!   tprint = tprint + 1
!
    do 159 j = 0, itr
!   tprint = tprint + 1
    if(tprint.le.100)then
    write(fileunit,trim(adjustl(f102)))tprint,RNA,DNA1,DNA2
    tprint = tprint + tstep
    n_steps = n_steps + 1
    else
    go to 303
    endif
!
    159 continue
!   endif
!   write(234,*) tprint
    else
    go to 324
    endif
!
    else
!
    accel = accel + 1
!   write(156,*) 'USE GASA'
!   tprint = tprint + 1
    treal = treal + least
!
    expl = a1*least
    exp2 = a2*least

```

```

    exp3 = a3*least
    exp4 = a4*least
    exp5 = a5*least
    exp6 = a6*least
    exp7 = a7*least
    exp8 = a8*least
    exp9 = a9*least
    exp10 = a10*least
!
n1 = poidev(exp1,idum)
n2 = poidev(exp2,idum)
n3 = poidev(exp3,idum)
n4 = poidev(exp4,idum)
n5 = poidev(exp5,idum)
n6 = poidev(exp6,idum)
n7 = poidev(exp7,idum)
n8 = poidev(exp8,idum)
n9 = poidev(exp9,idum)
n10 = poidev(exp10,idum)
!
write(143,*) n1,n2,n3,n4,n5,n6,n7,n8,n9,n10
!
RNA = RNA - n1 + n2 + n3 - n4
DNA1 = DNA1 + n1 - n2 + n7 - n8 - n9 + n10
mspec = mspec - n3 + n4 - 2*n5 + 2*n6
Dspec = Dspec + n5 - n6 - n7 + n8 - n9 + n10
DNA = DNA - n7 + n8
DNA2 = DNA2 + n9 - n10
!
!*****CHECK TO PRINT tprint*****
!
if(treal.gt.tprint)then
tmed = treal-tprint
tmedp = tmed/tstep
itr = int(tmedp)
!
do 59 j = 0, itr
!
tprint = tprint + 1
if(tprint.le.100)then
!
ctop = ctop + 1
!
write(2134,*) ctop
write(fileunit,trim(adjustl(f102)))tprint,RNA,DNA1,DNA2
!
tprint = tprint + 1
tprint = tprint + tstep
!
write(291,*) tprint
n_steps = n_steps + 1
else
go to 303
endif
59 continue

```

```

!
!   else
!   write(237,*) 'hi'
!   go to 324
!   endif
!
!   endif
!
!
324   steps = steps + 1
!
!   33   continue
!
!
303  write(88,*)'number of steps = ', steps
!   write(98,*) exact, accel, n_steps
!
!   close(fileunit)
end do

CALL compileStats(3,nrun,n_steps)
!   call cpu_time(tfi)
!   write(897,*) 'cputime',tfi-tin !CPU TIME
!
close(98)
close(897)
!
stop
end
!*****MAIN PROGRAM ENDS*****
!
!*****STATISTICS*****
!
SUBROUTINE compileStats(N_comp, N_run, n_steps)
!
IMPLICIT NONE
INTEGER N_run, n_steps, N_comp
INTEGER run, d, j, fileunit, k102, jjj, kk, jj
REAL, DIMENSION(n_steps):: tempt
DOUBLE PRECISION, DIMENSION(1:n_steps, N_comp) :: rtempc,concsun,concsunsq
REAL, DIMENSION(1:n_steps, N_comp)::stdconc, meanconc, variance
REAL, DIMENSION(1:n_steps, N_comp)::cvconc
INTEGER, DIMENSION(1:n_steps, N_comp) ::tempc
REAL tttt
!
CHARACTER(LEN=20):: f102, f151, f202, num
CHARACTER*25 momfilename, datfilename, crun
!
concsun(1:n_steps,1:N_comp) =0;
concsunsq(1:n_steps,1:N_comp) =0;
!

```

```

write(num,*) N_comp*3
write(f102,*) '(e16.9',trim(adjustl(num)), 'I20)'
!
do d=1,N_run !***** run loop starts *****!
!
!   read data
!       write(crun,*) d
!
!       datfilename = './data/x1out.'//trim(adjustl(crun))
!       fileunit=1000+2*d
!
!       write(*,*) 'datfilename in getstats is ',datfilename
!       open(fileunit, file=trim(adjustl(datfilename)))
!       tempt(1:n_steps) =0.0d0
!       tempc(1:n_steps,1:N_comp) =0
!
!       write(*,*) 'tempc is'
!
!       write(*,*) 'nsteps N_comp',n_steps,N_comp
!read time data
!read conc data
!   do j=1,n_steps
!
!       read(fileunit,trim(adjustl(f102)),end=10) tempt(j),(tempc(j,k102),k102=1,N_comp)
!       !write(*,*)tempt(j),(tempc(j,k102),k102=1,N_comp)
!       rtempc(j,1:N_comp)=tempc(j,1:N_comp) ! converting integer conc to real to store large values
!
! for initial condition
!       concsum(j,1:N_comp) = rtempc(j,1:N_comp) + concsum(j,1:N_comp)
!
!       concsumsq(j, 1:N_comp)= ((rtempc(j,1:N_comp))*2) +&
&       concsumsq(j, 1:N_comp)
!
!   end do !j
10  continue
!   close(fileunit)
!
! end do
!
! meanconc(1:n_steps,1:N_comp) =0
! stdconc(1:n_steps,1:N_comp) =0
! cvconc(1:n_steps,1:N_comp) =0
!
! print *, 'n_runs',N_run
! meanconc(1:n_steps,1:N_comp) = DBLE(concsum)/DBLE(N_run)
!
! do jjj=1,n_steps
!   do kk = 1,N_comp
!     stdconc(jjj,kk) = SQRT((DBLE(concsumsq(jjj,kk)) * DBLE(N_run) &

```



```

&      - DBLE(concsum(jjj,kk)**2) / DBLE(N_run *(N_run-1)))
!
      cvconc(jjj,kk) = stdconc(jjj,kk)/meanconc(jjj,kk)
      end do          !kk
    end do          !jjj
!
  jj=0
!
  open(unit=71,file='finalstats', status='replace')
!
  write(71,*) ' STEP      TIME      MEAN (all components)      STDEV      CV'
!
  write(num,*) N_comp*5
  write(num,*) N_comp*4
  write(f202,*) '(I10,e16.9,',trim(adjustl(num)),',e30.9)'
!
!202 format(I10,e16.9,30e30.9)
  do jj=1,n_steps
    tttt=(jj-1)*tempt(2)
    write(71,trim(adjustl(f202))) jj,tttt,meanconc(jj,:),stdconc(jj,:),variance(jj,:),cvconc(jj,:)
  end do
!
  close(71)
!
  stop
  write(*,*) 'all stats are in the file finalstats'
!
return
END SUBROUTINE compilestats

```

### (III) BDTAU

```

! PROGRAM FOR CARLETTI-BURRAGE MODEL
! FORTRAN 95 COMPILER HAVE BEEN USED FOR COMPILATION
! AUTHORS: SHANTANU KADAM AND KUMAR VANKA
! PHYSICAL CHEMISTRY DIVISION, NATIONAL CHEMICAL LABORATORY
! PUNE,MAHARASHTRA-411008, INDIA
implicit none
integer *4 i,steps,j,mu,tinc,cont,itr,nrun,run
CHARACTER*30 crun
CHARACTER*50 datfilename
INTEGER fileunit,n_steps
integer *4 N,exact,accel,toz
real *8 tau,tmed,tmedp,tstep
integer *4 it,tmpo,ip
real *8 sr1,sr2,sr3,tp,r56,avg,tprint
real *8 eps,z1,z2,ap,r1,r2,r3,ran3
real *8 de1,de2,de3,de4,numer,ran
real *8 b1,b2,a1,a2,a0,one,two,four

```

```

real *8 c1,c2,c3,c4
integer, dimension(20)::k1max,K
integer, dimension(20,20)::nu
integer, dimension(10)::X(10),X1twl(10)
real *8 a(20),prob(20),bnldev
real *8 c5,c6,c7,c8,c9,c10
real *8 three,r,s,asum5
integer *4 cou1,cou2,cou3,cou4,idum,ctop
real *8 tin,tfi,ftt,treal
CHARACTER(LEN=20):: f102, num
!
nrun = 500
!
!*****INPUT/OUTPUT FILES*****
!
open(68,file='nuvalues',form='formatted',access='sequential',status='unknown')
open(76,file='nuwrite',form='formatted',access='sequential',status='unknown')
open(897,file='cputime',form='formatted',access='sequential',status='unknown')
open(98,file='counter',form='formatted',access='sequential',status='unknown')
open(88,file='steps',form='formatted',access='sequential',status='unknown')
open(11,file='species',form='formatted',access='sequential',status='unknown')
!
write(num,*) 3 !N_component
write(f102,*) '(e16.9',trim(adjustl(num)),I20)'
!
      call cpu_time(tin)
do run=1,nrun
  n_steps = 0
  write(crun,*) run
  datfilename='./data/x1out. '//trim(adjustl(crun))
  fileunit = 1000 + run
  write(*,*) run,'fileunit=',fileunit
!
      open(unit=fileunit, file= trim(adjustl(datfilename)),status='replace')
!
      rewind 98
      rewind 897
      rewind 68
      rewind 76
!
!*****MAIN PROGRAM*****
!
      ftr = 2.00
      tstep = 0.25
      tp = 0.0
!
      ctop = 0
      idum = 6321 + run
!

```

```

steps = 0
treal = 0.0
tprint = 0.0
!
X(1) = 200
X(2) = 200
X(3) = 600
X(4) = 000
X(5) = 000
X(6) = 000
! do i = 1, 6
! read(11,*) X(i)
! write(59,*) X(i)
! enddo
! close(11)
! close(59)
!
c1 = 0.078
c2 = 3.9E-3
c3 = 7.0E-4
c4 = 0.043
c5 = 0.083
c6 = 0.5
c7 = 0.020
c8 = 0.479
c9 = 2.0E-4
c10 = 8.765E-12
!
do j = 1,10
do i = 1,6
read(68,*) nu(i,j)
write(76,*) nu(i,j)
enddo
enddo
!
do 33 i = 1, 20000
!
a(1) = c1*X(4)
a(2) = c2*X(5)
a(3) = c3*X(1)
a(4) = c4*X(4)
a(5) = c5*(X(1)*((X(1))-1))/2
a(6) = c6*X(3)
a(7) = c7*X(2)*X(3)
a(8) = c8*X(5)
a(9) = c9*X(5)*X(3)
a(10) = c10*X(6)
!
a0 = a(1)+a(2)+a(3)+a(4)+a(5)+a(6)+a(7)+a(8)+a(9)+a(10)

```

```

!
X1twl(1) = X(1)
X1twl(2) = X(2)
X1twl(3) = X(3)
X1twl(4) = X(4)
X1twl(5) = X(5)
X1twl(6) = X(6)
!
if(a0.eq.0.0)then
go to 324
endif
!
tau = ftr/a0
trealm = trealm + tau
!
do 111 j = 1,10
!
k1max(1) = int(X1twl(4)/abs(nu(4,1)))
k1max(2) = int(X1twl(5)/abs(nu(5,2)))
k1max(3) = int(X1twl(1)/abs(nu(1,3)))
k1max(4) = int(X1twl(4)/abs(nu(4,4)))
k1max(5) = int(X1twl(1)/abs(nu(1,5)))
k1max(6) = int(X1twl(3)/abs(nu(3,6)))
!
a1 = int(X1twl(2)/abs(nu(2,7)))
b1 = int(X1twl(3)/abs(nu(3,7)))
!
k1max(7) = min(a1,b1)
k1max(8) = int(X1twl(5)/abs(nu(5,8)))
!
a2 = int(X1twl(3)/abs(nu(3,9)))
b2 = int(X1twl(5)/abs(nu(5,9)))
!
k1max(9) = min(a2,b2)
k1max(10) = int(X1twl(6)/abs(nu(6,10)))
!
do 112 ip = 1,6
!
if(nu(ip,j).lt.0)then
!
if((a(j).eq.0.0).and.(k1max(j).eq.0))then
prob(j) = 0.0
else
prob(j) = (a(j)*tau)/k1max(j)
endif
!
if((prob(j).lt.1.0).and.(k1max(j).ge.0))then
!
K(j) = bnldev(prob(j),k1max(j),idum)

```

```

X1twl(ip) = X1twl(ip) + nu(ip,j)*K(j)
!
elseif((prob(j).ge.1.0).and.(k1max(j).gt.0))then
prob(j) = 1.0
!
K(j) = bnldev(prob(j),k1max(j),idum)
X1twl(ip) = X1twl(ip) + nu(ip,j)*K(j)
!
endif
!
else
!
write(159,*) 'vuij is +ve'
!
endif
112   continue
111   continue
!
X(4) = X(4) - K(1) + K(2) + K(3) - K(4)
X(5) = X(5) + K(1) - K(2) + K(7) - K(8) - K(9) + K(10)
X(1) = X(1) - K(3) + K(4) - 2*K(5) + 2*K(6)
X(3) = X(3) + K(5) - K(6) - K(7) + K(8) - K(9) + K(10)
X(2) = X(2) - K(7) + K(8)
X(6) = X(6) + K(9) - K(10)
!
!
!*****CHECK TO PRINT tprint*****
!
if(treal.gt.tprint)then
tmed = treal-tprint
tmedp = tmed/tstep
itr = int(tmedp)
!
do 159 j = 0, itr
!
if(tprint.le.100)then
write(fileunit,trim(adjustl(f102)))tprint,X(2),X(5),X(6)
tprint = tprint + tstep
n_steps = n_steps + 1
else
go to 303
endif
!
159  continue
!
else
!
go to 324
endif
!

```

```

324         steps = steps + 1
!
!       33  continue
303  write(88,*)'number of steps = ', steps
      write(98,*) n_steps
!
      close(fileunit)
end do
!       close(11)
!       close(59)
      close(68)
      close(76)
!
CALL compileStats(3,nrun,n_steps)
      call cpu_time(tfi)
      write(897,*) 'cputime',tfi-tin !CPU TIME
!
      close(11)
      close(59)
!       close(68)
!       close(76)
      close(98)
      close(897)
!
stop
end
!*****MAIN PROGRAM ENDS*****
!
!*****STATISTICS*****
!
SUBROUTINE compileStats(N_comp, N_run, n_steps)
!
IMPLICIT NONE
INTEGER N_run, n_steps, N_comp
INTEGER run, d, j, fileunit, k102, jjj, kk, jj
REAL, DIMENSION(n_steps):: tempt
DOUBLE PRECISION, DIMENSION(1:n_steps, N_comp) :: rtempc,concsun,concsunsq
REAL, DIMENSION(1:n_steps, N_comp)::stdconc, meanconc, variance
REAL, DIMENSION(1:n_steps, N_comp)::cvconc
INTEGER, DIMENSION(1:n_steps, N_comp) ::tempc
REAL tttt
!
CHARACTER(LEN=20):: f102, f151, f202, num
CHARACTER*25 momfilename, datfilename, crun
!
concsun(1:n_steps,1:N_comp) =0;
concsunsq(1:n_steps,1:N_comp) =0;
!
write(num,*) N_comp*3

```

```

write(f102,*) '(e16.9',trim(adjustl(num)),I20)'
!
do d=1,N_run !***** run loop starts *****!
!
!   read data
!       write(crun,*) d
!
!       datfilename = './data/x1out.//trim(adjustl(crun))
!       fileunit=1000+2*d
!
!       write(*,*) 'datfilename in getstats is ',datfilename
!       open(fileunit, file=trim(adjustl(datfilename)))
!       tempt(1:n_steps) =0.0d0
!       tempc(1:n_steps,1:N_comp) =0
!
!       write(*,*) 'tempc is'
!
!       write(*,*) 'nsteps N_comp',n_steps,N_comp
!
!       do j=1,n_steps
!
!           read(fileunit,trim(adjustl(f102)),end=10) tempt(j),(tempc(j,k102),k102=1,N_comp)
!           !write(*,*)tempt(j),(tempc(j,k102),k102=1,N_comp)
!           rtempc(j,1:N_comp)=tempc(j,1:N_comp) ! converting integer conc to real to store large values
!
! for initial condition
!       concsum(j,1:N_comp) = rtempc(j,1:N_comp) + concsum(j,1:N_comp)
!
!       concsumsq(j, 1:N_comp)= ((rtempc(j,1:N_comp))**2) +&
&       concsumsq(j, 1:N_comp)
!
!       end do !j
10   continue
!       close(fileunit)
!
!       end do
!
!       meanconc(1:n_steps,1:N_comp) =0
!       stdconc(1:n_steps,1:N_comp) =0
!       cvconc(1:n_steps,1:N_comp) =0
!       write(*,*) meanconc(1,1),'here before stdev'
!       print *, 'n_runs',N_run
!       meanconc(1:n_steps,1:N_comp) = DBLE(concsum)/DBLE(N_run)
!
!       do jjj=1,n_steps
!           do kk = 1,N_comp
!
!
!
!
!               stdconc(jjj,kk) = SQRT((DBLE(concsumsq(jjj,kk)) * DBLE(N_run) &

```

```

&      - DBLE(concsum(jjj,kk)**2) / DBLE(N_run *(N_run-1)))
!
!
      cvconc(jjj,kk) = stdconc(jjj,kk)/meanconc(jjj,kk)
      end do          !kk
end do          !jjj
!
do jjj=1,n_steps
  do kk = 1,N_comp
    variance(jjj,kk) = ((DBLE(concsumsq(jjj,kk)) * DBLE(N_run)   &
&      - DBLE(concsum(jjj,kk)**2) / DBLE(N_run *(N_run-1)))
    end do
  end do
!
jj=0

open(unit=71,file='finalstats', status='replace')
!
write(71,*) ' STEP    TIME      MEAN (all components)    STDEV      VAR CV'
!
! write(num,*) N_comp*5
! write(num,*) N_comp*4
! write(f202,*) '(I10,e16.9,',trim(adjustl(num)),',e30.9)'
!
!202 format(I10,e16.9,30e30.9)
do jj=1,n_steps
  tttt=(jj-1)*tempt(2)
  write(71,trim(adjustl(f202))) jj,tttt,meanconc(jj,:),stdconc(jj,:),variance(jj,:),cvconc(jj,:)
end do
!
close(71)
! stop
! write(*,*) 'all stats are in the file finalstats'
!
return
END SUBROUTINE compilestats

```

#### (IV) NOISE

```

! FORTRAN 95 COMPILER HAVE BEEN USED FOR COMPILATION
! AUTHORS: SHANTANU KADAM AND KUMAR VANKA
! PHYSICAL CHEMISTRY DIVISION, NATIONAL CHEMICAL LABORATORY
! PUNE,MAHARASHTRA-411008, INDIA
implicit none
integer *4 i,steps,j,mu,k,tinc,cont,itr,nrun,run
CHARACTER*30 crun
CHARACTER*50 datfilename
integer *4 fileunit,n_steps
integer *4 DNA,DNA1,DNA2,RNA,Dspec,mspec

```



```

integer *4 DNA_b,DNA1_b,DNA2_b,RNA_b,Dspec_b,mspec_b
real *8 exp1,exp2,exp3,exp4,tau_R1,Npm
real *8 exp5,exp6,exp7,exp8,exp9,exp10
real *8 exp1p,exp2p,exp3p,exp4p
real *8 exp5p,exp6p,exp7p,exp8p,exp9p,exp10p
real *8 sig1,sig2,sig3,sig4,sig5
real *8 sig6,sig7,sig8,sig9,sig10
integer *4 n1,n2,n3,n4,n5,n6,n7,n8,n9,n10
integer *4 n1p,n2p,n3p,n4p,n5p,n6p,n7p,n8p,n9p,n10p
real *8 treal,tmed,tmedp,tstep,theta
integer *4 x1,x2,x3,t,it,tmpo
real *8 tp,r56,avg,tprint,ftt,a0,a9,a10
real *8 eps,z1,z2,ap,r1,r2,r3,k01,k02,delta_a0
real *8 numer,ran3,tau_R,poidev,a5,a6,a7,a8
real *8 c1,c2,c3,c4,N0_R
real *8 three,r,s,a1,a2,a3,a4,taue,k0,x0
integer *4 idum,ctop,noise,poisson
real *8 tin,tfi,c5,c6,c7,c8,c9,c10
CHARACTER(LEN=20):: f102, num
!
nrun = 500
!*****INPUT/OUTPUT FILES*****
!
open(897,file='cputime',form='formatted',access='sequential',status='unknown')
open(88,file='tot_steps',form='formatted',access='sequential',status='unknown')
open(98,file='counter',form='formatted',access='sequential',status='unknown')
!
write(num,*) 3 !N_component
write(f102,*) '(e16.9',trim(adjustl(num)), 'I20)'
!
      call cpu_time(tin)
do run=1,nrun
  n_steps = 0
  write(crun,*) run
  datfilename='./data/x1out.//trim(adjustl(crun))
  fileunit = 1000 + run
  write(*,*) run,'fileunit=',fileunit
!
      open(unit=fileunit, file= trim(adjustl(datfilename)),status='replace')
!
      rewind 88
      rewind 98
      rewind 897
!
!*****MAIN PROGRAM*****
!
      tstep = 0.25
      eps = 0.06
      tp = 0.0

```

```

!
ctop = 0
idum = 46321 + run
!
steps = 0
poisson = 0
noise = 0
treal = 0.0
tprint = 0.0
!
mspec = 200
DNA = 200
Dspec = 600
RNA = 0
DNA1 = 0
DNA2 = 0
!
c1 = 0.078
c2 = 3.9E-3
c3 = 7.0E-4
c4 = 0.043
c5 = 0.083
c6 = 0.5
c7 = 0.020
c8 = 0.479
c9 = 2.0E-4
c10 = 8.765E-12
!
do 33 i = 1,20000
!
RNA_b = RNA
DNA1_b = DNA1
mspec_b = mspec
Dspec_b = Dspec
DNA_b = DNA
DNA2_b = DNA2
!
a1 = c1*RNA
a2 = c2*DNA1
a3 = c3*mspec
a4 = c4*RNA
a5 = c5*(mspec*(mspec-1))/2
a6 = c6*Dspec
a7 = c7*DNA*Dspec
a8 = c8*DNA1
a9 = c9*DNA1*Dspec
a10 = c10*DNA2
!
a0 = a1+a2+a3+a4+a5+a6+a7+a8+a9+a10

```

```

!
k01 = (a1/a0)*c1+(a2/a0)*c2+(a3/a0)*c3+(a4/a0)*c4+(a5/a0)*c5
k02 = (a6/a0)*c6+(a7/a0)*c7+(a8/a0)*c8+(a9/a0)*c9+(a10/a0)*c10
k0 = k01 + k02
!
x0 = (k0 + sqrt(k0*k0+8.0*a0*k0))/(2.0*k0)
!
N0_R = (16*eps*a0)/((2*x0-1)*k0)
!
tau_R = N0_R/a0
!
exp1 = a1*tau_R
exp2 = a2*tau_R
exp3 = a3*tau_R
exp4 = a4*tau_R
exp5 = a5*tau_R
exp6 = a6*tau_R
exp7 = a7*tau_R
exp8 = a8*tau_R
exp9 = a9*tau_R
exp10 = a10*tau_R
!
n1 = poidev(exp1,idum)
n2 = poidev(exp2,idum)
n3 = poidev(exp3,idum)
n4 = poidev(exp4,idum)
n5 = poidev(exp5,idum)
n6 = poidev(exp6,idum)
n7 = poidev(exp7,idum)
n8 = poidev(exp8,idum)
n9 = poidev(exp9,idum)
n10 = poidev(exp10,idum)
!
treal = treal + tau_R
!
RNA = RNA - n1 + n2 + n3 - n4
DNA1 = DNA1 + n1 - n2 + n7 - n8 - n9 + n10
mspec = mspec - n3 + n4 - 2*n5 + 2*n6
Dspec = Dspec + n5 - n6 - n7 + n8 - n9 + n10
DNA = DNA - n7 + n8
DNA2 = DNA2 + n9 - n10
!
!*****
!
if((DNA.lt.0).or.(DNA2.lt.0).or.(DNA1.lt.0).or.(Dspec.lt.0).or.(mspec.lt.0) &
.or.(RNA.lt.0))then
!
noise = noise + 1
!

```

```

RNA = RNA_b
DNA1 = DNA1_b
mspec = mspec_b
Dspec = Dspec_b
DNA = DNA_b
DNA2 = DNA2_b
!
sig1 = sqrt(exp1)
sig2 = sqrt(exp2)
sig3 = sqrt(exp3)
sig4 = sqrt(exp4)
sig5 = sqrt(exp5)
sig6 = sqrt(exp6)
sig7 = sqrt(exp7)
sig8 = sqrt(exp8)
sig9 = sqrt(exp9)
sig10 = sqrt(exp10)
!
exp1p = exp1 - sig1
exp2p = exp2 - sig2
exp3p = exp3 - sig3
exp4p = exp4 - sig4
exp5p = exp5 - sig5
exp6p = exp6 - sig6
exp7p = exp7 - sig7
exp8p = exp8 - sig8
exp9p = exp9 - sig9
exp10p = exp10 - sig10
!
n1 = poidev(exp1p,idum)
n2 = poidev(exp2p,idum)
n3 = poidev(exp3p,idum)
n4 = poidev(exp4p,idum)
n5 = poidev(exp5p,idum)
n6 = poidev(exp6p,idum)
n7 = poidev(exp7p,idum)
n8 = poidev(exp8p,idum)
n9 = poidev(exp9p,idum)
n10 = poidev(exp10p,idum)
!
!*****NOISE*****
!
RNA = RNA - n1 + n2 + n3 - n4
DNA1 = DNA1 + n1 - n2 + n7 - n8 - n9 + n10
mspec = mspec - n3 + n4 - 2*n5 + 2*n6
Dspec = Dspec + n5 - n6 - n7 + n8 - n9 + n10
DNA = DNA - n7 + n8
DNA2 = DNA2 + n9 - n10
!

```

```

!*****CHECK TO PRINT tprint*****
!
  if(treal.gt.tprint)then
    tmed = treal-tprint
    tmedp = tmed/tstep
    itr = int(tmedp)
!
  do 1159 j = 0, itr
!
    if(tprint.le.100)then
      write(fileunit,trim(adjustl(f102)))tprint,Dspec,mspec,RNA
      tprint = tprint + tstep
      n_steps = n_steps + 1
    else
      go to 303
    endif
!
1159  continue
!
    else
      go to 324
    endif
!
else
!
poisson = poisson + 1
!
!*****CHECK TO PRINT tprint*****
!
  if(treal.gt.tprint)then
    tmed = treal-tprint
    tmedp = tmed/tstep
    itr = int(tmedp)
!
  do 159 j = 0, itr
!
    if(tprint.le.100)then
      write(fileunit,trim(adjustl(f102)))tprint,Dspec,mspec,RNA
      tprint = tprint + tstep
      n_steps = n_steps + 1
    else
      go to 303
    endif
!
159  continue
!
    else
      go to 324
    endif

```

```

        endif
    !
324        steps = steps + 1
    33    continue
    303    write(88,*)'number of steps = ', steps
        write(98,*) poisson,noise,n_steps
        !
        close(fileunit)
        !
    end do
!
    CALL compileStats(3,nrun,n_steps)
        call cpu_time(tfi)
        write(897,*) 'cputime',tfi-tin !CPU TIME
!
close(88)
close(98)
close(897)
!
stop
end
!*****MAIN PROGRAM ENDS*****
!*****
SUBROUTINE compileStats(N_comp, N_run, n_steps)
!
IMPLICIT NONE
INTEGER N_run, n_steps, N_comp
INTEGER run, d, j, fileunit, k102, jjj, kk, jj
REAL, DIMENSION(n_steps):: tempt
DOUBLE PRECISION, DIMENSION(1:n_steps, N_comp) :: rtempc,concsun,concsunsq
REAL, DIMENSION(1:n_steps, N_comp)::stdconc, meanconc, variance
REAL, DIMENSION(1:n_steps, N_comp)::cvcconc
INTEGER, DIMENSION(1:n_steps, N_comp) ::tempc
REAL ttt
!
CHARACTER(LEN=20):: f102, f151, f202, num
CHARACTER*25 momfilename, datfilename, crun
!
concsun(1:n_steps,1:N_comp) =0;
concsunsq(1:n_steps,1:N_comp) =0;
!
write(num,*) N_comp*3
write(f102,*) '(e16.9',trim(adjustl(num)), 'I20)'
!
!*****LOOP OVER THE TOTAL NUMBER OF RUNS*****
!
    do d=1,N_run
!
        write(crun,*) d

```

```

!
datfilename = './data/x1out. '//trim(adjustl(crun))
fileunit=1000+2*d
!
write(*,*) 'datfilename in getstats is ',datfilename
open(fileunit, file=trim(adjustl(datfilename)))
tempt(1:n_steps) =0.0d0
tempc(1:n_steps,1:N_comp) =0
!
write(*,*) 'tempc is'
!
write(*,*) 'nsteps N_comp',n_steps,N_comp
!
do j=1,n_steps
!
read(fileunit,trim(adjustl(f102)),end=10) tempt(j),(tempc(j,k102),k102=1,N_comp)
!
rtempc(j,1:N_comp)=tempc(j,1:N_comp)
!
concsun(j,1:N_comp) = rtempc(j,1:N_comp) + concsun(j,1:N_comp)
!
concsunsq(j, 1:N_comp)= ((rtempc(j,1:N_comp))**2) +&
&   concsunsq(j, 1:N_comp)
!
end do
10 continue
close(fileunit)

end do
!
!*****INITIALIZATION*****
!
meanconc(1:n_steps,1:N_comp) = 0
stdconc(1:n_steps,1:N_comp) = 0
cvconc(1:n_steps,1:N_comp) = 0
!
print *,'n_runs',N_run
meanconc(1:n_steps,1:N_comp) = DBLE(concsun)/DBLE(N_run)
!
do jjj=1,n_steps
do kk = 1,N_comp
!
stdconc(jjj,kk) = SQRT((DBLE(concsunsq(jjj,kk)) * DBLE(N_run) &
&   - DBLE(concsun(jjj,kk))**2) / DBLE(N_run *(N_run-1)))
!
cvconc(jjj,kk) = stdconc(jjj,kk)/meanconc(jjj,kk)
end do
end do

```

```

!
do jjj=1,n_steps
  do kk = 1,N_comp
    variance(jjj,kk) = ((DBLE(concsumsq(jjj,kk)) * DBLE(N_run)  &
    & - DBLE(concsum(jjj,kk)**2) / DBLE(N_run *(N_run-1)))
  end do
end do
!
jj=0
!
open(unit=71,file='finalstats', status='replace')
!
write(71,*) ' STEP    TIME      MEAN (all components)    STDEV      VAR    CV'
!
write(num,*) N_comp*4
write(f202,*) '(I10,e16.9,',trim(adjustl(num)),',e30.9)'
!
do jj=1,n_steps
  tttt=(jj-1)*tempt(2)
  write(71,trim(adjustl(f202))) jj,tttt,meanconc(jj,:),stdconc(jj,:),variance(jj,:),cvconc(jj,:)
end do
!
close(71)
!
return
END SUBROUTINE compilestat

```
